# Supplementary material
Source: MDPI journal article supplement (https://www.mdpi.com/2073-4344/13/5/849)
Supplement: s1 [file s1]

Supporting Information for:

# **Novel Copper(II) Complexes with BIAN Ligands: Synthesis, Structure and Catalytic Properties of the Oxidation of Isopropylbenzene**

## **Table of contents**

**Table S1.** Crystal data and structure refinement for **2**.

**Table S2.** Cartesian atomic coordinates for all optimized equilibrium model structures.

**Table S3.** Cartesian atomic coordinates for model supramolecular associate based on the obtained experimental X-ray geometry of **2**.

**Table S4.** Conversion of IPBHP and products obtained in CH<sub>3</sub>CN solutions of **1** and **2**.  
Conditions: 0.001 mmol of **1** or **2**, 4 mmol of IPBHP in 2.5 ml CH<sub>3</sub>CN, T = 30 °C, 130 min, Ar.

**Figure S1.** Formation of  $\pi$ - $\pi$  interactions between the dimers in the crystal structure of **2**.

**Figure S2.** Crystal packing of **2**.

**Figure S3.** UV-Vis diffuse reflectance spectra of complexes **1** and **2** in solid state.

**Figure S4.** UV-Vis absorption spectra of solutions of complexes **1** and **2** in CH<sub>3</sub>CN ( $5 \cdot 10^{-4}$  M).

**Figure S5.** Cyclic voltammograms of **1** (A) and **2** (B) in CH<sub>3</sub>CN in the -2.3–2.0 V region (black line) and the 0–1.0 V region (blue line) at a potential scan rate of 100 mV/s.

**Figure S6.** Kinetic curves of oxygen uptake by CuBr<sub>2</sub> (A) and CuCl<sub>2</sub> (B) solutions.  
Conditions: 1 mL of IPB, 1.5 mL of CH<sub>3</sub>CN,  $5 \cdot 10^{-4}$  M of catalyst.

**Figure S7.** UV-Vis spectra of **1** (A) and **2** (B) ( $3 \cdot 10^{-4}$  M) in CH<sub>3</sub>CN solution (1), 10 min after addition of IPBHP (2), 40 min after addition of IPBHP (3).

**Table S1.** Crystal data and structure refinement for **2**.

|                                                                                                                |                                                                                    |
|----------------------------------------------------------------------------------------------------------------|------------------------------------------------------------------------------------|
| Chemical formula                                                                                               | C <sub>26</sub> H <sub>20</sub> Br <sub>2</sub> CuN <sub>2</sub>                   |
| <i>M</i> <sub>r</sub>                                                                                          | 583.80                                                                             |
| Crystal system, space group                                                                                    | Monoclinic, <i>P</i> 2 <sub>1</sub> / <i>n</i>                                     |
| <i>a</i> , <i>b</i> , <i>c</i> (Å)                                                                             | 11.544 (2), 10.6495 (19), 18.722 (4)                                               |
| $\alpha$ , $\beta$ , $\gamma$ (°)                                                                              | 90, 90.549 (7), 90                                                                 |
| <i>V</i> (Å <sup>3</sup> )                                                                                     | 2301.4 (8)                                                                         |
| <i>Z</i>                                                                                                       | 4                                                                                  |
| $\mu$ (mm <sup>-1</sup> )                                                                                      | 4.44                                                                               |
| Crystal size (mm)                                                                                              | 0.10 × 0.08 × 0.05                                                                 |
| <i>T</i> <sub>min</sub> , <i>T</i> <sub>max</sub>                                                              | 0.626, 0.746                                                                       |
| No. of measured, independent and observed [ <i>I</i> > 2σ( <i>I</i> )] reflections                             | 34785, 7663, 5729                                                                  |
| <i>R</i> <sub>int</sub>                                                                                        | 0.047                                                                              |
| $\theta$ values (°)                                                                                            | $\theta_{\text{max}} = 31.5$ , $\theta_{\text{min}} = 2.1$                         |
| (sin $\theta/\lambda$ ) <sub>max</sub> (Å <sup>-1</sup> )                                                      | 0.736                                                                              |
| Range of <i>h</i> , <i>k</i> , <i>l</i>                                                                        | -16 ≤ <i>h</i> ≤ 16, -13 ≤ <i>k</i> ≤ 15, -27 ≤ <i>l</i> ≤ 27                      |
| <i>R</i> [ <i>F</i> <sup>2</sup> > 2σ( <i>F</i> <sup>2</sup> )], <i>wR</i> ( <i>F</i> <sup>2</sup> ), <i>S</i> | 0.043, 0.098, 1.03                                                                 |
| No. of reflections                                                                                             | 7663                                                                               |
| No. of parameters                                                                                              | 280                                                                                |
| No. of restraints                                                                                              | 0                                                                                  |
| Weighting scheme                                                                                               | $w = 1/[\sigma^2(F_o^2) + (0.0282P)^2 + 4.529P]$<br>where $P = (F_o^2 + 2F_c^2)/3$ |
| $\Delta\rho_{\text{max}}$ , $\Delta\rho_{\text{min}}$ (e Å <sup>-3</sup> )                                     | 1.41, -0.62                                                                        |

**Table S2.** Cartesian atomic coordinates for optimized model structures.

| Atom     | X         | Y         | Z         |
|----------|-----------|-----------|-----------|
| <b>1</b> |           |           |           |
| C        | -3.388118 | -1.093245 | 0.692623  |
| H        | -2.840989 | -1.261578 | 1.625099  |
| C        | -3.370957 | -0.398816 | -1.629686 |
| C        | -4.728699 | -0.699964 | -1.724644 |
| H        | -5.242906 | -0.553069 | -2.680254 |
| C        | -5.440646 | -1.187897 | -0.622090 |
| C        | -4.746502 | -1.379365 | 0.580542  |
| H        | -5.278703 | -1.770298 | 1.454153  |
| C        | -2.708097 | -0.582159 | -0.414899 |
| C        | -0.933884 | 0.951903  | -0.250588 |
| C        | -1.646185 | 2.234422  | -0.132103 |
| C        | -2.975895 | 2.601075  | -0.085059 |
| H        | -3.776683 | 1.866935  | -0.198603 |
| C        | -3.288765 | 3.970861  | 0.118873  |
| H        | -4.341324 | 4.265446  | 0.153012  |
| C        | -2.311776 | 4.933902  | 0.284061  |
| H        | -2.595153 | 5.978615  | 0.447957  |
| C        | -0.934370 | 4.578248  | 0.256034  |
| C        | 0.175258  | 5.447386  | 0.451839  |
| H        | 0.003337  | 6.514290  | 0.626325  |
| C        | 1.461954  | 4.946579  | 0.435481  |
| H        | 2.301951  | 5.627171  | 0.600091  |
| C        | 1.739402  | 3.571197  | 0.210706  |
| H        | 2.772445  | 3.217006  | 0.210357  |
| C        | -0.640889 | 3.223666  | 0.034766  |
| C        | 0.683129  | 2.710325  | 0.000846  |
| C        | 0.551152  | 1.250345  | -0.207283 |
| C        | 2.751817  | 0.345728  | -0.317118 |
| C        | 3.459390  | -0.503619 | 0.542608  |
| H        | 2.902413  | -1.179419 | 1.198686  |
| C        | 4.848276  | -0.469061 | 0.548594  |
| H        | 5.393843  | -1.125498 | 1.234555  |
| C        | 5.563044  | 0.365637  | -0.323375 |
| C        | 4.837467  | 1.172759  | -1.206934 |
| H        | 5.372209  | 1.812676  | -1.916858 |
| C        | 3.443345  | 1.170006  | -1.208412 |
| N        | -1.320067 | -0.268341 | -0.315217 |
| N        | 1.344082  | 0.255650  | -0.310214 |

|    |           |           |           |
|----|-----------|-----------|-----------|
| Cu | 0.157058  | -1.660102 | -0.094976 |
| Br | -0.138808 | -2.075621 | 2.215927  |
| Br | 1.412877  | -3.321583 | -1.010263 |
| H  | 2.889073  | 1.787782  | -1.921838 |
| H  | -2.821790 | -0.018252 | -2.496383 |
| C  | 7.069707  | 0.355700  | -0.327971 |
| H  | 7.473275  | 0.500982  | 0.688331  |
| H  | 7.453686  | -0.611249 | -0.697724 |
| H  | 7.477823  | 1.148527  | -0.974572 |
| C  | -6.902042 | -1.539681 | -0.730678 |
| H  | -7.377353 | -1.036224 | -1.587564 |
| H  | -7.031506 | -2.627673 | -0.869897 |
| H  | -7.451550 | -1.257841 | 0.182414  |
| 2  |           |           |           |
| C  | 2.691010  | -0.038625 | 2.216772  |
| H  | 3.408549  | -0.178152 | 3.039133  |
| H  | 1.745161  | 0.334629  | 2.645646  |
| H  | 2.485885  | -1.031466 | 1.776046  |
| C  | 3.004259  | 2.043308  | -0.971621 |
| H  | 2.402981  | 2.234404  | -1.865479 |
| C  | 3.242078  | 0.896120  | 1.175955  |
| C  | 4.522995  | 1.446256  | 1.279690  |
| H  | 5.130131  | 1.203589  | 2.157912  |
| C  | 5.045234  | 2.274882  | 0.286338  |
| H  | 6.055651  | 2.680565  | 0.392230  |
| C  | 4.289217  | 2.566166  | -0.849450 |
| H  | 4.702233  | 3.189459  | -1.647450 |
| C  | 2.485364  | 1.237142  | 0.042517  |
| C  | 0.132514  | 1.399621  | -0.133018 |
| C  | -0.173247 | 2.839959  | -0.021471 |
| C  | 0.574981  | 3.982937  | 0.167247  |
| H  | 1.664299  | 3.945550  | 0.238775  |
| C  | -0.104440 | 5.227114  | 0.263752  |
| H  | 0.488041  | 6.133866  | 0.413253  |
| C  | -1.479081 | 5.328488  | 0.169108  |
| H  | -1.962118 | 6.308086  | 0.242647  |
| C  | -2.275363 | 4.163596  | -0.017775 |
| C  | -3.693822 | 4.100993  | -0.121684 |
| H  | -4.279187 | 5.024645  | -0.068700 |
| C  | -4.333938 | 2.887204  | -0.286343 |
| H  | -5.424285 | 2.864718  | -0.365481 |
| C  | -3.624977 | 1.658226  | -0.351238 |
| H  | -4.163012 | 0.714560  | -0.470830 |

|    |           |           |           |
|----|-----------|-----------|-----------|
| C  | -1.588703 | 2.943140  | -0.101203 |
| C  | -2.249572 | 1.696022  | -0.254905 |
| C  | -1.188813 | 0.677549  | -0.259861 |
| C  | -2.407391 | -1.318688 | -0.350067 |
| C  | -2.867903 | -1.788299 | -1.578405 |
| H  | -2.269099 | -1.615423 | -2.477377 |
| C  | -4.080507 | -2.473190 | -1.643550 |
| H  | -4.446850 | -2.841954 | -2.605639 |
| C  | -4.809564 | -2.694914 | -0.475835 |
| H  | -5.757947 | -3.238497 | -0.514892 |
| C  | -4.319684 | -2.241088 | 0.749844  |
| H  | -4.885529 | -2.437400 | 1.666468  |
| C  | -3.111276 | -1.544888 | 0.843722  |
| C  | -2.573568 | -1.057760 | 2.161423  |
| H  | -3.169672 | -1.453902 | 2.997107  |
| H  | -1.530357 | -1.393378 | 2.290195  |
| H  | -2.594052 | 0.045402  | 2.225732  |
| N  | 1.186348  | 0.677977  | -0.084206 |
| N  | -1.174892 | -0.599951 | -0.307556 |
| Cu | 0.757594  | -1.403567 | -0.223988 |
| Br | 2.726156  | -1.961485 | -1.334216 |
| Br | 0.237099  | -3.341362 | 0.977903  |

**Table S3.** Cartesian atomic coordinates for model supramolecular associate based on the obtained experimental X-ray geometry of **2**.

| Atom | X         | Y         | Z         |
|------|-----------|-----------|-----------|
| C    | 4.064647  | 10.278897 | 10.360279 |
| H    | 4.054652  | 11.254157 | 10.261226 |
| H    | 3.406393  | 10.013235 | 11.036468 |
| H    | 4.957442  | 9.989071  | 10.642894 |
| C    | 3.404389  | 7.634627  | 7.703749  |
| H    | 3.433489  | 6.687417  | 7.634125  |
| C    | 3.721658  | 9.638862  | 9.048863  |
| C    | 3.408205  | 10.392847 | 7.907810  |
| H    | 3.414172  | 11.341281 | 7.959742  |
| C    | 3.091765  | 9.787955  | 6.717145  |
| H    | 2.865241  | 10.322763 | 5.965005  |
| C    | 3.099821  | 8.416300  | 6.599202  |
| H    | 2.897828  | 8.006912  | 5.765194  |
| C    | 3.665283  | 8.260817  | 8.908455  |
| C    | 2.851799  | 6.967968  | 10.677228 |
| C    | 1.412488  | 6.932825  | 10.412698 |
| C    | 0.589901  | 7.381168  | 9.396702  |
| H    | 0.946641  | 7.852068  | 8.652649  |
| C    | -0.792836 | 7.122386  | 9.492742  |
| H    | -1.363009 | 7.408378  | 8.788302  |
| C    | -1.349236 | 6.467441  | 10.574823 |
| H    | -2.286502 | 6.314802  | 10.604609 |
| C    | -0.532843 | 6.023357  | 11.634814 |
| C    | -0.962202 | 5.387582  | 12.831470 |
| H    | -1.886193 | 5.209565  | 12.963735 |
| C    | -0.059464 | 5.029759  | 13.795608 |
| H    | -0.375958 | 4.602256  | 14.583881 |
| C    | 1.335188  | 5.273632  | 13.660816 |
| H    | 1.942171  | 5.032315  | 14.351177 |
| C    | 0.842036  | 6.267231  | 11.515561 |
| C    | 1.777979  | 5.866810  | 12.508156 |
| C    | 3.086301  | 6.270426  | 11.985836 |
| C    | 4.666385  | 5.499402  | 13.582187 |
| C    | 5.375611  | 4.224657  | 13.417441 |
| H    | 5.522773  | 3.852158  | 12.556194 |
| C    | 5.811726  | 3.601661  | 14.527605 |
| H    | 6.252599  | 2.762374  | 14.469045 |
| C    | 5.601097  | 4.216137  | 15.787538 |
| H    | 5.936946  | 3.780700  | 16.561039 |
| C    | 4.970460  | 5.348179  | 15.942923 |

|    |           |           |           |
|----|-----------|-----------|-----------|
| H  | 4.844564  | 5.708004  | 16.812371 |
| C  | 4.462120  | 6.057436  | 14.780340 |
| C  | 3.793172  | 7.302362  | 14.958191 |
| H  | 3.755070  | 7.519090  | 15.913101 |
| H  | 4.280721  | 8.006805  | 14.482356 |
| H  | 2.882190  | 7.237965  | 14.601516 |
| N  | 3.873291  | 7.468494  | 10.090695 |
| N  | 4.305221  | 6.160736  | 12.360446 |
| Cu | 5.605456  | 6.936658  | 10.995487 |
| Br | 6.884738  | 6.951781  | 9.022279  |
| Br | 7.293998  | 7.386387  | 12.549529 |
| C  | 7.299964  | 0.370603  | 8.360861  |
| H  | 7.309959  | -0.604657 | 8.459915  |
| H  | 7.958218  | 0.636265  | 7.684672  |
| H  | 6.407170  | 0.660429  | 8.078247  |
| C  | 7.960222  | 3.014873  | 11.017391 |
| H  | 7.931122  | 3.962083  | 11.087015 |
| C  | 7.642953  | 1.010638  | 9.672277  |
| C  | 7.956406  | 0.256653  | 10.813331 |
| H  | 7.950439  | -0.691781 | 10.761398 |
| C  | 8.272846  | 0.861545  | 12.003995 |
| H  | 8.499371  | 0.326737  | 12.756136 |
| C  | 8.264790  | 2.233200  | 12.121939 |
| H  | 8.466784  | 2.642588  | 12.955947 |
| C  | 7.699328  | 2.388683  | 9.812686  |
| C  | 8.512812  | 3.681532  | 8.043912  |
| C  | 9.952123  | 3.716676  | 8.308442  |
| C  | 10.774710 | 3.268332  | 9.324438  |
| H  | 10.417971 | 2.797432  | 10.068491 |
| C  | 12.157447 | 3.527114  | 9.228399  |
| H  | 12.727620 | 3.241122  | 9.932838  |
| C  | 12.713847 | 4.182059  | 8.146317  |
| H  | 13.651113 | 4.334698  | 8.116532  |
| C  | 11.897454 | 4.626143  | 7.086326  |
| C  | 12.326813 | 5.261918  | 5.889671  |
| H  | 13.250804 | 5.439935  | 5.757406  |
| C  | 11.424076 | 5.619741  | 4.925532  |
| H  | 11.740569 | 6.047244  | 4.137260  |
| C  | 10.029423 | 5.375868  | 5.060324  |
| H  | 9.422440  | 5.617185  | 4.369964  |
| C  | 10.522575 | 4.382269  | 7.205580  |
| C  | 9.586633  | 4.782690  | 6.212985  |
| C  | 8.278310  | 4.379074  | 6.735305  |

|    |          |          |          |
|----|----------|----------|----------|
| C  | 6.698226 | 5.150098 | 5.138953 |
| C  | 5.989000 | 6.424843 | 5.303699 |
| H  | 5.841838 | 6.797342 | 6.164946 |
| C  | 5.552885 | 7.047839 | 4.193535 |
| H  | 5.112013 | 7.887126 | 4.252095 |
| C  | 5.763515 | 6.433363 | 2.933603 |
| H  | 5.427666 | 6.868800 | 2.160101 |
| C  | 6.394152 | 5.301321 | 2.778217 |
| H  | 6.520047 | 4.941496 | 1.908770 |
| C  | 6.902491 | 4.592064 | 3.940800 |
| C  | 7.571439 | 3.347138 | 3.762949 |
| H  | 7.609541 | 3.130410 | 2.808040 |
| H  | 7.083890 | 2.642695 | 4.238784 |
| H  | 8.482421 | 3.411535 | 4.119624 |
| N  | 7.491320 | 3.181006 | 8.630446 |
| N  | 7.059390 | 4.488764 | 6.360695 |
| Cu | 5.759155 | 3.712842 | 7.725653 |
| Br | 4.479873 | 3.697719 | 9.698861 |
| Br | 4.070613 | 3.263113 | 6.171611 |



**Table S4.** Conversion of IPBHP and products obtained in CH<sub>3</sub>CN solutions of **1** and **2**.  
 Conditions: 0.001 mmol of **1** or **2**, 4 mmol of IPBHP in 2.5 ml CH<sub>3</sub>CN, 30 °C, 130 min, Ar.

| Complex  | Conversion<br>of IPBHP, % | PP/mmol | AP/mmol |
|----------|---------------------------|---------|---------|
| <b>1</b> | 18                        | 0.60    | 0.12    |
| <b>2</b> | 11                        | 0.35    | 0.08    |

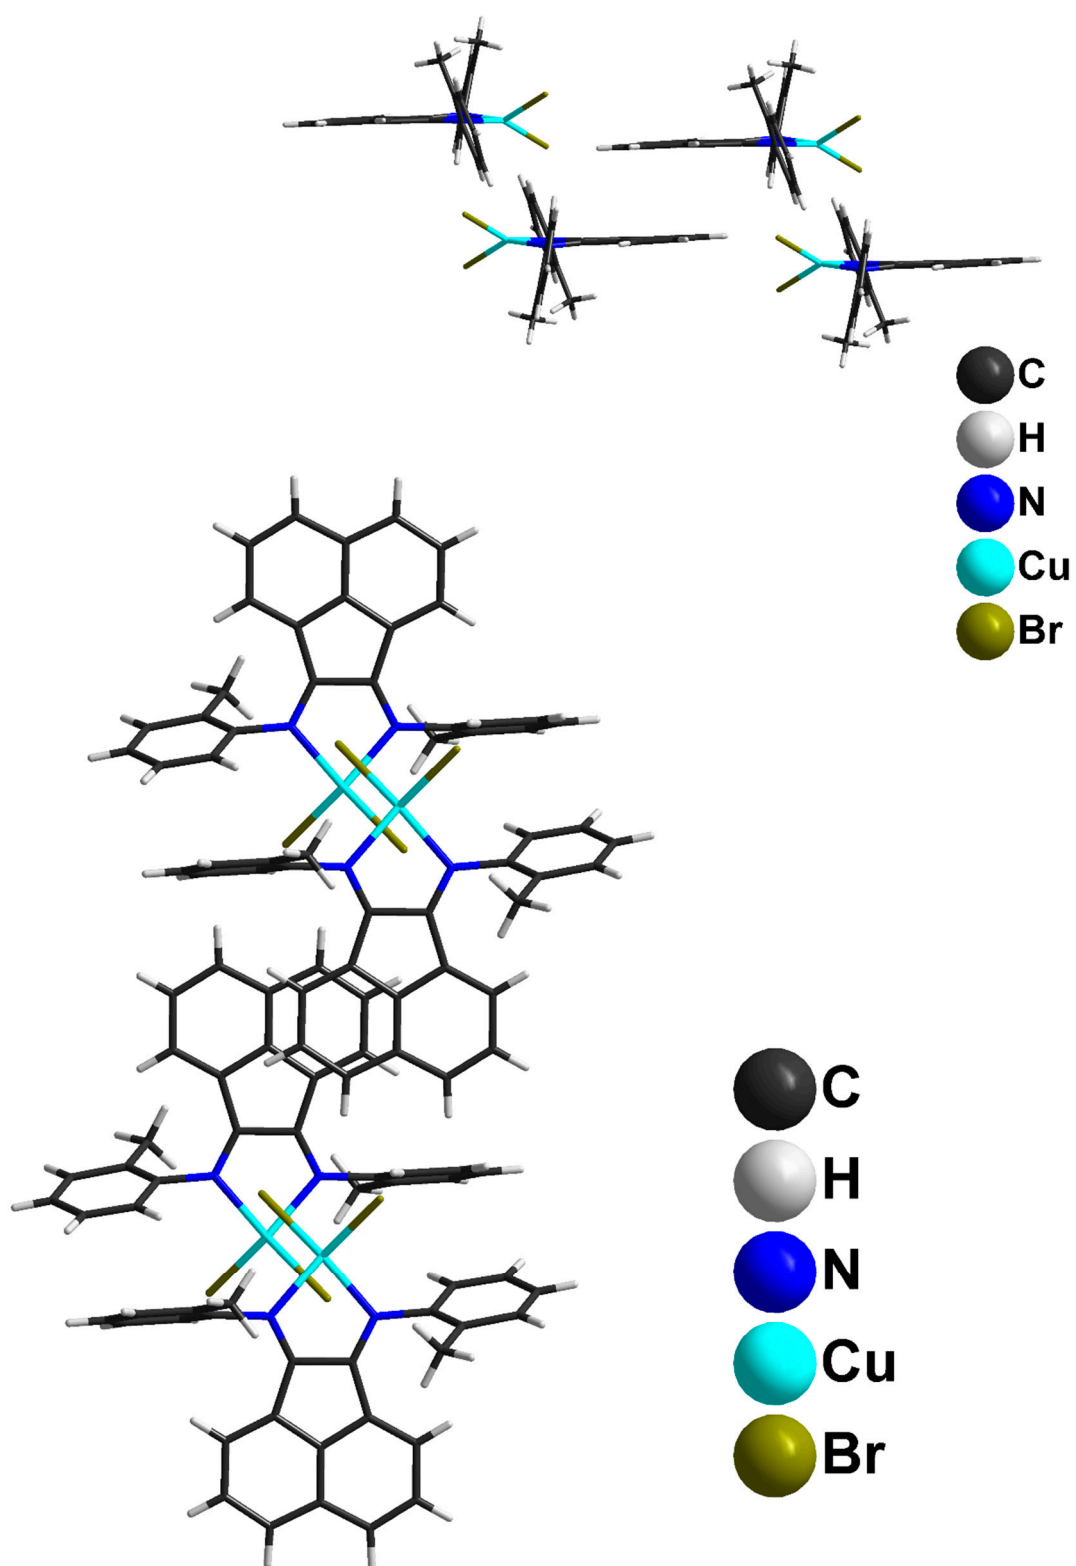

**Figure S1.** Formation of  $\pi$ - $\pi$  interactions between the dimers in the crystal structure of **2**.

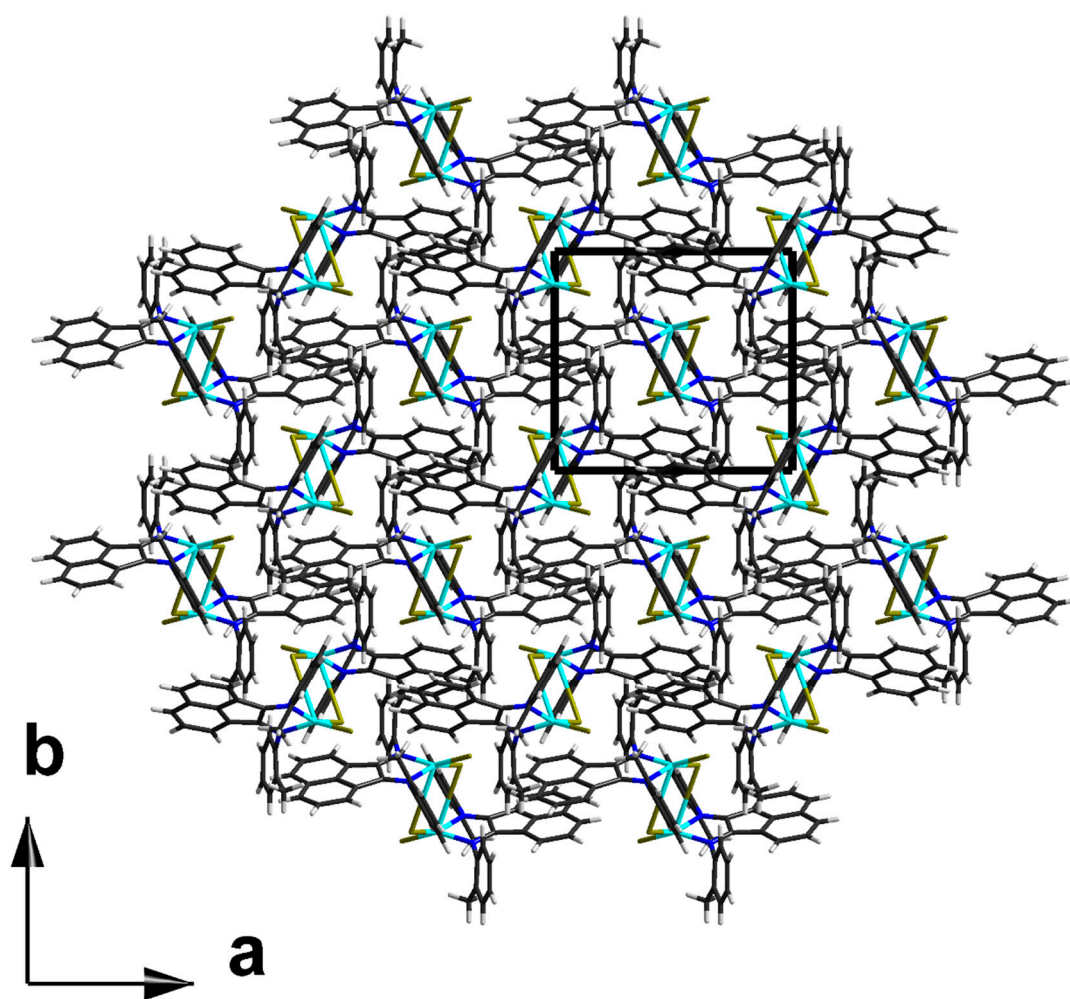

**Figure S2.** Crystal packing of **2**.

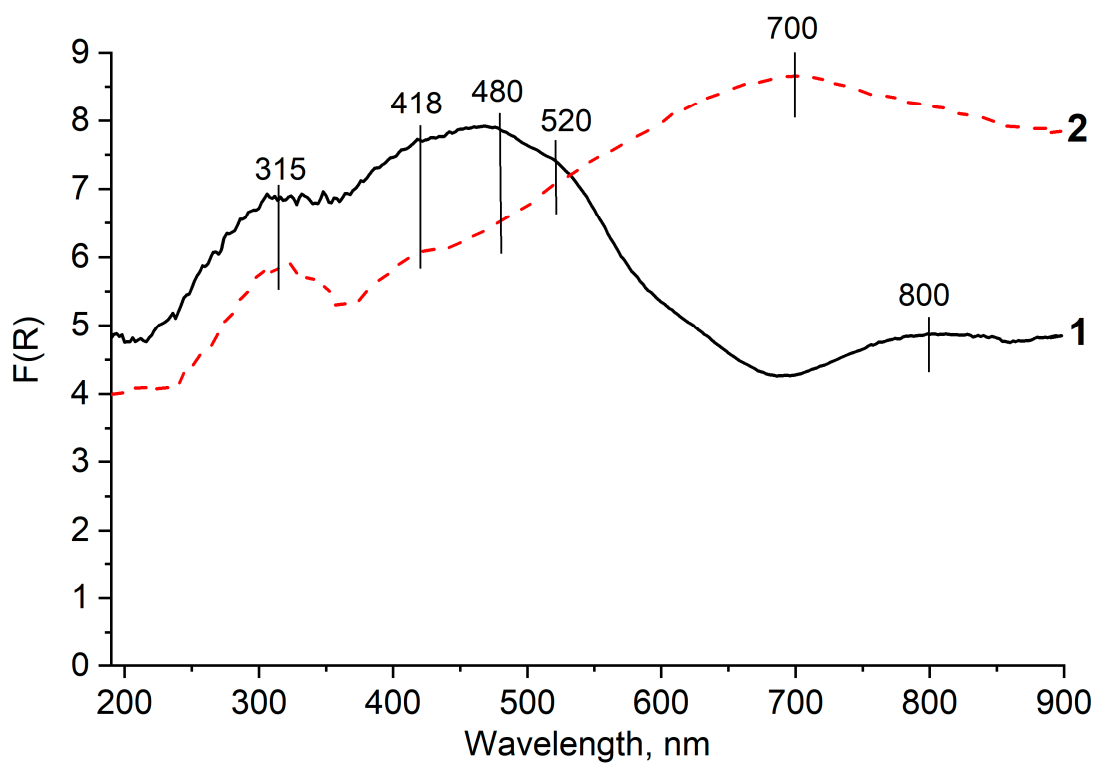

**Figure S3.** UV-Vis diffuse reflectance spectra of complexes 1 and 2 in solid state.

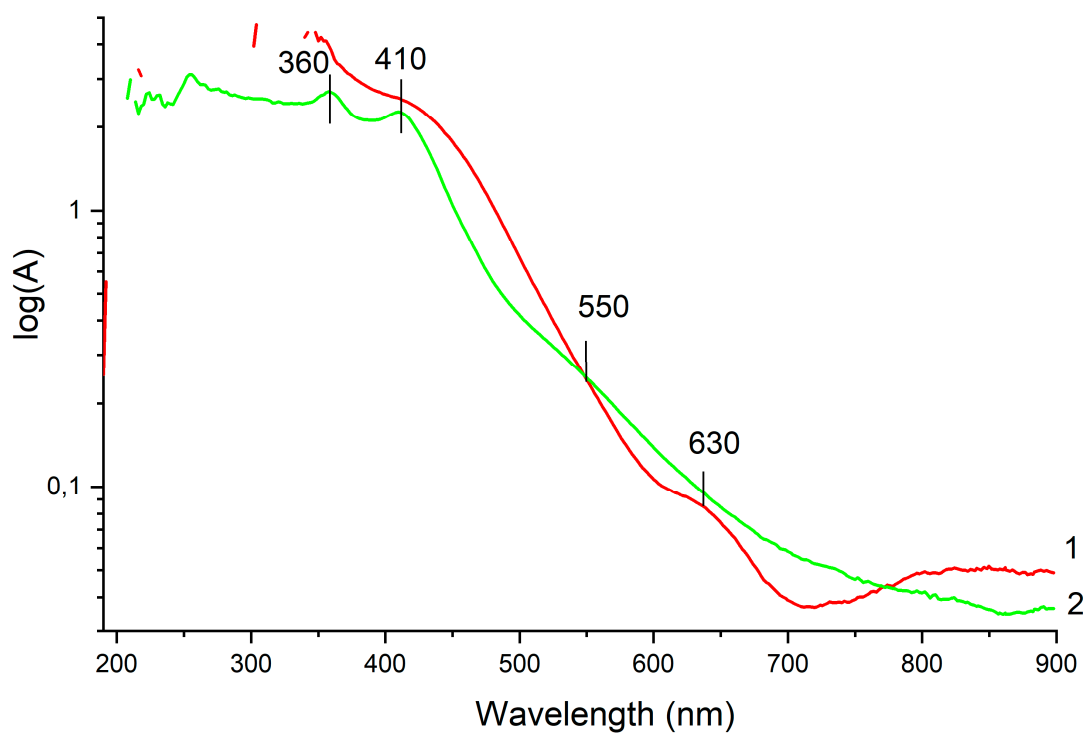

**Figure S4.** UV-Vis absorption spectra of  $\text{CH}_3\text{CN}$  solutions of complexes 1 and 2 ( $5 \cdot 10^{-4}$  M).

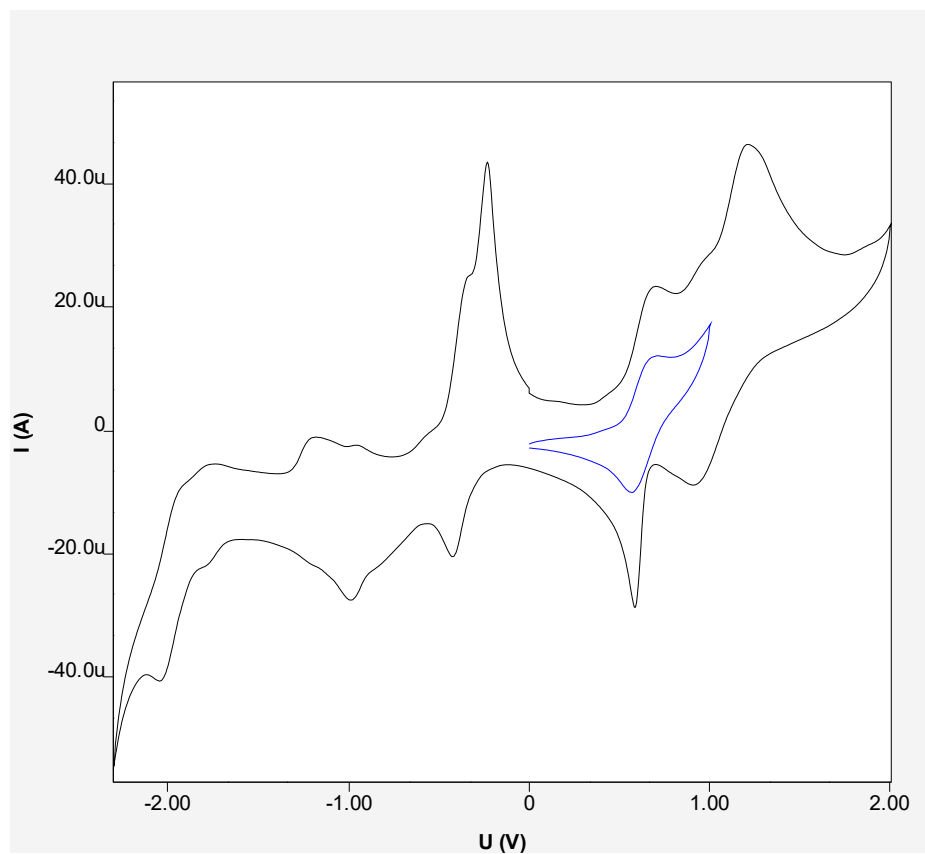

**A**

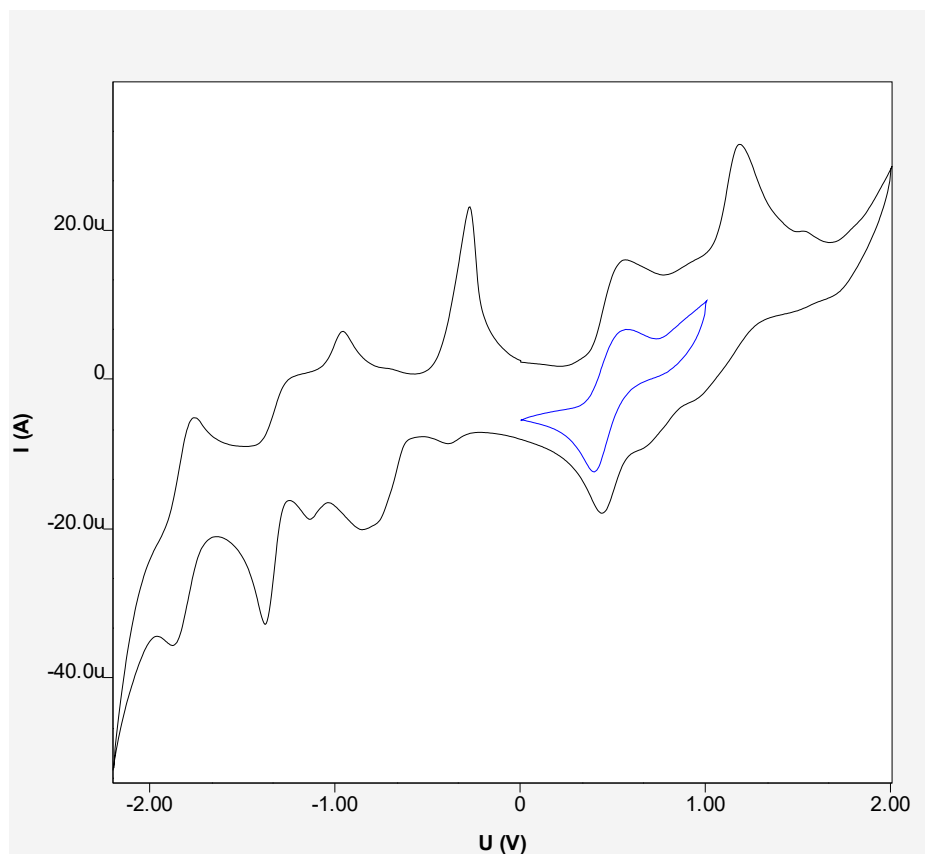

**B**

**Figure S5.** Cyclic voltammograms of **1** (A) and **2** (B) in CH<sub>3</sub>CN in the -2.3–2.0 V region (black line) and the 0–1.0 V region (blue line) at a potential scan rate of 100 mV/s.

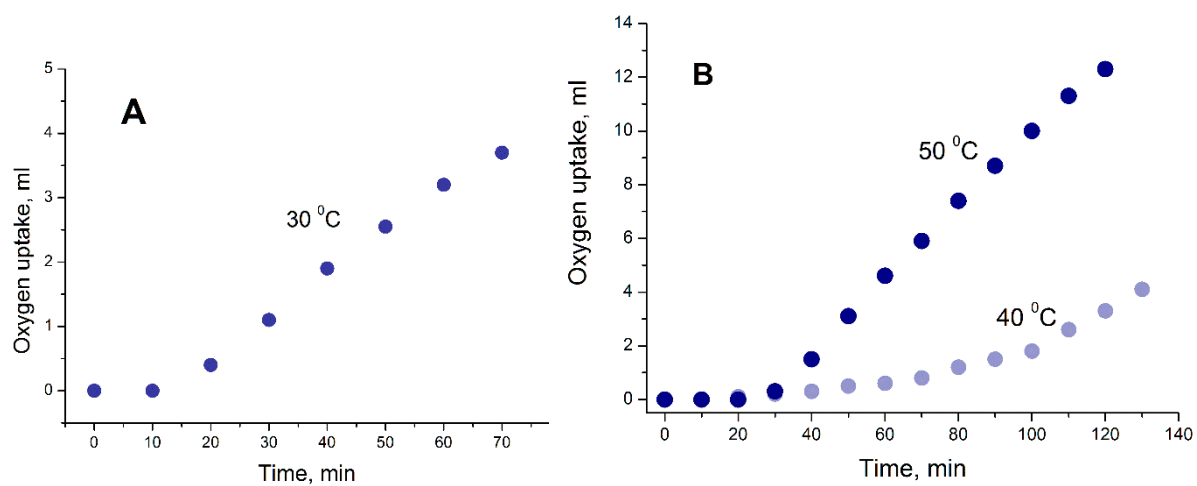

**Figure S6.** Kinetic curves of oxygen uptake by CuBr<sub>2</sub> (A) and CuCl<sub>2</sub> (B) solutions. Conditions: 1 mL of IPB, 1.5 mL of CH<sub>3</sub>CN, 5·10<sup>-4</sup> M of catalyst.

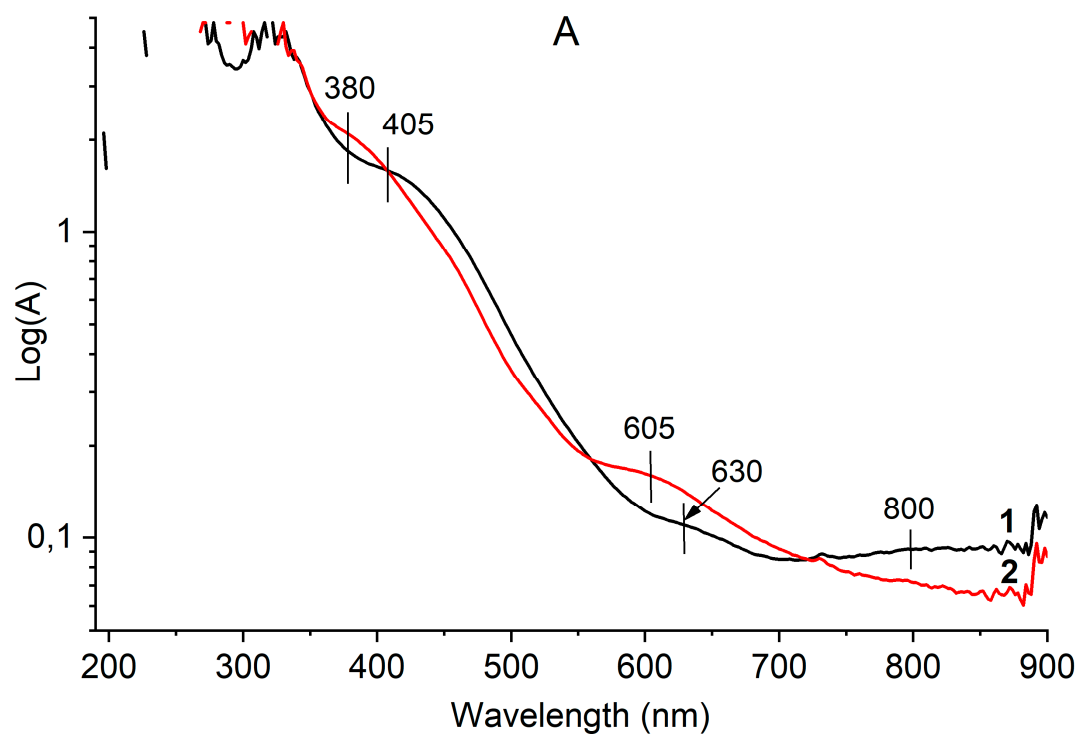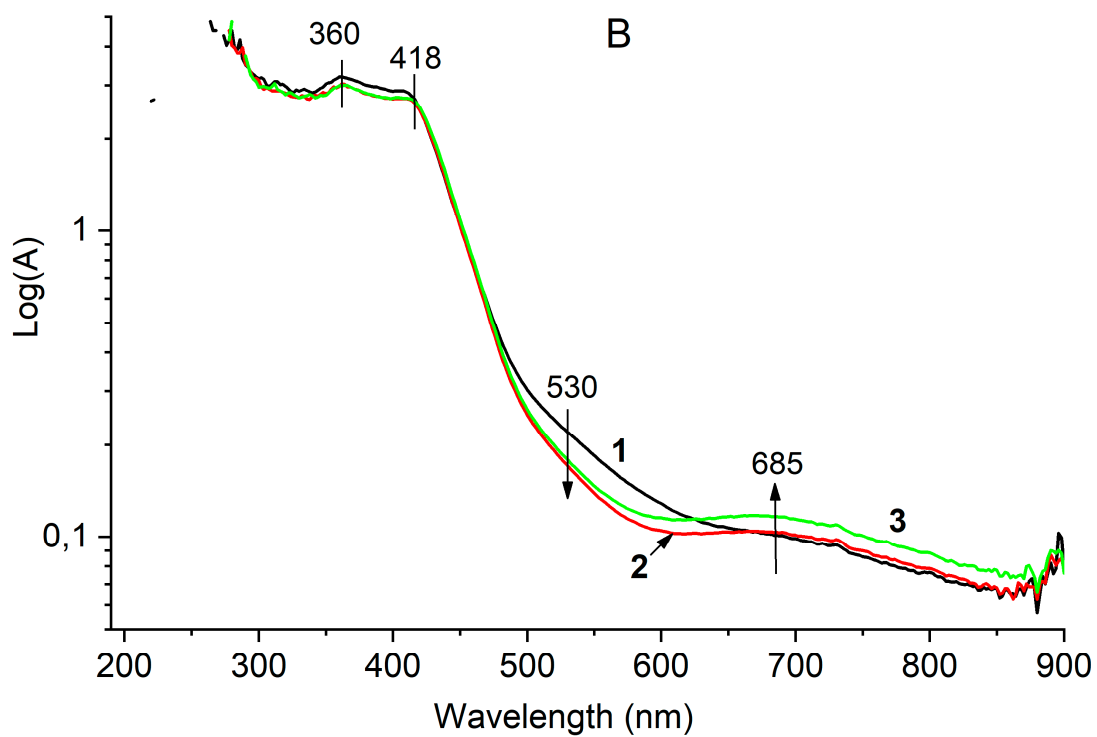

**Figure S7.** UV-Vis spectra of **1** (A) and **2** (B) ( $3 \cdot 10^{-4}$  M) in CH<sub>3</sub>CN solution (1), 10 min after addition of IPBHP (2), 40 min after addition of IPBHP (3).
